# Supplementary material for: Computational design and molecular dynamics simulations suggest the mode of substrate binding in ceramide synthases
Source: PubMed Central journal article supplement (PMC10122649; doi:10.1038/s41467-023-38047-x), 2023-04-22
Supplement: 41467_2023_38047_MOESM1_ESM.pdf [file 41467_2023_38047_MOESM1_ESM.pdf]

## SUPPLEMENTARY INFORMATION

### Computational design and molecular dynamics simulations suggest the mode of substrate binding in ceramide synthases

Iris D. Zelnik<sup>1</sup>, Beatriz Mestre<sup>1</sup>, Jonathan Weinstein<sup>1</sup>, Tamir Dingjan<sup>1</sup>, Stav Izrailov<sup>1</sup>, Shifra Ben-Dor<sup>2</sup>, Sarel J Fleishman<sup>1</sup> and Anthony H. Futerman<sup>1\*</sup>

From the <sup>1</sup>Department of Biomolecular Sciences and <sup>2</sup>Life Sciences Core Facilities, Weizmann Institute of Science, Rehovot 76100, Israel

\* To whom correspondence should be addressed at [tony.futerman@weizmann.ac.il](mailto:tony.futerman@weizmann.ac.il)

#### Contents

Supplementary Table 1. RMSDs for AlphaFold2 CerS models.

Supplementary Table 2. Percent sequence similarity and identity between human CerS proteins.

Supplementary Table 3. Composition of the ER-like membrane used in MD simulations.

Supplementary Figure 1. The highly conserved residue, Trp 327 is critical for CerS activity.

Supplementary Figure 2. Sequence alignment of WT and mPROSS designs.

Supplementary Figure 3. CerS stabilization by mPROSS.

Supplementary Figure 4. Acyl-CoA specificity of CerS2 d18 is similar to the WT.

Supplementary Figure 5. RMSD of the TMDs of CerS2 during production-stage MD simulation.

Supplementary References

**Supplementary Table 1.** RMSD values (Å) of AlphaFold2 CerS models for superimposition of the structures of the full-length protein (above the diagonal) and for the TMDs (below the diagonal).

|          | CerS1 | CerS2 | CerS3 | CerS4 | CerS5 | CerS6 | Full length-Protein RMSD |
|----------|-------|-------|-------|-------|-------|-------|--------------------------|
| CerS1    |       | 2.02  | 1.35  | 0.86  | 2.18  | 1.72  | CerS1                    |
| CerS2    | 1.06  |       | 0.53  | 0.56  | 0.67  | 0.64  | CerS2                    |
| CerS3    | 0.93  | 0.37  |       | 0.74  | 0.66  | 0.80  | CerS3                    |
| CerS4    | 0.75  | 0.39  | 0.41  |       | 0.56  | 0.59  | CerS4                    |
| CerS5    | 0.95  | 0.47  | 0.50  | 0.46  |       | 0.43  | CerS5                    |
| CerS6    | 0.88  | 0.51  | 0.52  | 0.51  | 0.30  |       | CerS6                    |
| TMD RMSD | CerS1 | CerS2 | CerS3 | CerS4 | CerS5 | CerS6 |                          |

**Supplementary Table 2.** Percent sequence similarity (below the diagonal) and identity (above the diagonal) between human CerS proteins.

|            | CerS1 | CerS2 | CerS3 | CerS4 | CerS5 | CerS6 | Identity |
|------------|-------|-------|-------|-------|-------|-------|----------|
| CerS1      |       | 21.8  | 20.4  | 24.4  | 23.2  | 24.6  | CerS1    |
| CerS2      | 35.6  |       | 52.1  | 47.6  | 40.1  | 40.9  | CerS2    |
| CerS3      | 35.8  | 70.7  |       | 42.3  | 39.0  | 38.5  | CerS3    |
| CerS4      | 37.0  | 66.3  | 61.0  |       | 40.4  | 40.5  | CerS4    |
| CerS5      | 35.4  | 57.9  | 57.0  | 58.1  |       | 61.8  | CerS5    |
| CerS6      | 35.5  | 60.4  | 57.4  | 59.0  | 78.1  |       | CerS6    |
| Similarity | CerS1 | CerS2 | CerS3 | CerS4 | CerS5 | CerS6 |          |

**Supplementary Table 3. Composition of the ER-like membrane used in MD simulations.**

Lipid names correspond to the CHARMM forcefield convention. Counts are given as the total number of molecules of each lipid species in the cytoplasmic and ER luminal leaflets<sup>1,2</sup>. Some caution needs to be taken when considering ER lipid composition due to the high likelihood of contamination from other intracellular organelles; however the composition below is currently the best approximation of ER lipid composition.

| Lipid       | Cytoplasmic leaflet<br>(number of lipids) | ER luminal leaflet<br>(number of lipids) |
|-------------|-------------------------------------------|------------------------------------------|
| SOPA        | 2                                         | 2                                        |
| DPPA        | 2                                         | 2                                        |
| SLPC        | 34                                        | 10                                       |
| SOPC        | 20                                        | 6                                        |
| PYPC        | 18                                        | 5                                        |
| SLPE        | 18                                        | 28                                       |
| SOPE        | 10                                        | 16                                       |
| POPE        | 9                                         | 14                                       |
| SOPS        | 8                                         | 29                                       |
| POPS        | 2                                         | 7                                        |
| SLPS        | 2                                         | 6                                        |
| SLPG        | 10                                        | 10                                       |
| DGPG        | 5                                         | 5                                        |
| DEPG        | 5                                         | 5                                        |
| PSM         | 25                                        | 13                                       |
| NSM         | 9                                         | 5                                        |
| LSM         | 10                                        | 8                                        |
| Cholesterol | 20                                        | 20                                       |
| TOTAL       | 207                                       | 189                                      |

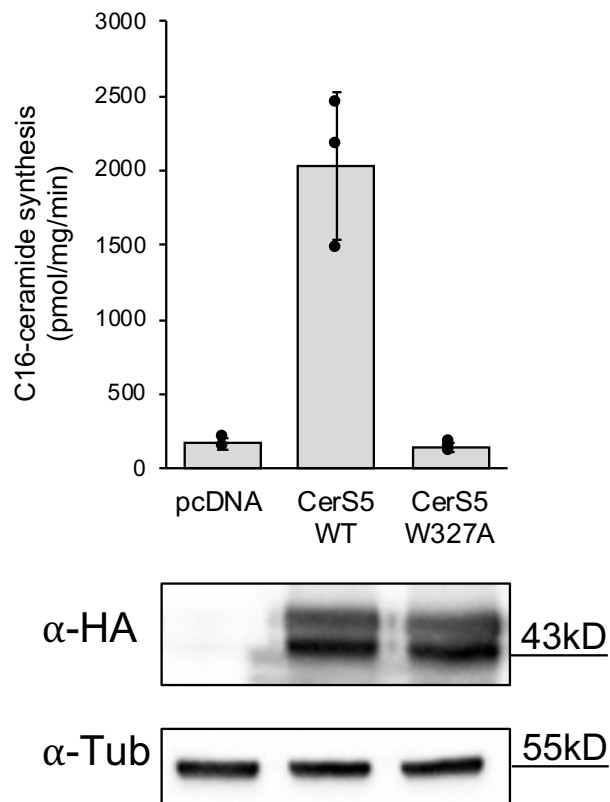

**Supplementary Fig. 1. The highly conserved residue, Trp 327 is critical for CerS activity.**

Homogenates (50  $\mu$ g of protein) were prepared from WT HEK cells overexpressing WT or CerS5<sup>W327A</sup>. Activity was measured using 1  $\mu$ g of protein and C16-CoA for 5 min. Results are means  $\pm$  S.D., n = 3 for CerS5 constructs and n=2 for the empty plasmid (pcDNA). Levels of protein expression, ascertained by western blotting using an anti-HA antibody and anti-tubulin as a loading control, are shown. Molecular weight markers are indicated. Results are of a single experiment, repeated three times with similar results. Source data are provided as a Source Data file.

```

CERS2_WT      1  -----MLQTLYDYFWWERLWLPVNLTWADLE-DRDGRVYAKASDLYITLPLALLFLIVRYFFELYVATPLAALLNIKE
CERS2_D5      1  -----MLQTLYDYFWWERLWLPVNLTWADLE-DRDGRVYAKASDLYITLPLALLFLIIRFFFELEFVATPLARLLNIKE
CERS2_D10     1  -----MLQTLYDYFWWERLWLPVNLTWADLE-DRDGRVYAKASDLYITLPLALLFLIIRFFFELEFVATPLARLLNIKE
CERS2_D13     1  -----MLQTLYDYFWWERLWLPVNLTWADLE-DRDGRVYAKASDLYITLPLALLFLIIRFFFELEFVATPLARLLNIKE
CERS2_D18     1  -----MLQTLYDYFWWERLWLPVNLTWADLE-DRDGRVYAKASDLYITLPLALLFLIIRFFFELEFVATPLARLLNIKE
CERS5_WT      1  MATAAQGPLSLWGWLWSERFWLPENVSWADLEGPADGYGYPRGRHILSVFPLAAGIFFVRLLFERFIAKPCALCIGIED
CERS5_D5      1  MATAAQGPLSLWGWLWSERFWLPENVSWADLEGPADGYGYPRGRHILSVFPLAAGIFFVRLLFERFIAKPCALCIGIED
CERS5_D13     1  MATAAQGPLSLWGWLWSERFWLPENVSWADLEGPADGYGYPRGRHILSVFPLAAGIFFVRLLFERFIAKPCALCIGIED
CERS5_D18     1  MATAAQGPLSLWGWLWSERFWLPENVSWADLEGPADGYGYPRGRHILSVFPLAAGIFFVRLLFERFIAKPCALCIGIED
      * . * . : : * * * : * * * * * * * * * * * * * * * * * * * * * * * * * * * * * * * * * * *
      . : * * * * * * * * * * * * * * * * * * * * * * * * * * * * * * * * * * * * * * * * *

CERS2_WT      73  KTRLRAPPNATLEHFYLTSGKQPKQVEVELLSRQSGLSGRQVERWFRRRRNQDRPSSLKKFREASWRFTFYLIAFIAGMA
CERS2_D5      73  KTRLRAPPNATLEHFYLTSGKQPKQVEVELLSRQSGLSGRQVERWFRRRRNQDRPSSLKKFREASWRFTFYLIAFIAGLA
CERS2_D10     73  KTRLRAPPNPTLEHFYLTSGKQPKQSEVELLSKQSGLSGRQVERWFRRRRNQDRPSSLKKFREASWRFTFYLIAFIAGLA
CERS2_D13     73  KTRLRAPPNPTLEHFYLTSGKQPKQSEVELLSKQSGLSGRQVERWFRRRRNQDRPSSLKKFREASWRFTFYLIAFIAGLA
CERS2_D18     73  KTRLRAPPNPTLEKFFYLTSGKQPKQSEVELLAKQSGLSGRQVERWFRRRRNQDRPSSLKKFREACWRFFFYLIAFIAGLL
CERS5_WT      81  SGPYQAQPNAILKVFISITKYPDKKRLEGLSKQLDWNVRKIQCFWRHRRNQDKPPTLTKFCESMRWFTFYLCIFCYGIR
CERS5_D5      81  SGPYQAQPNAILKVFISITKYPDKKRLEGLSKQLDWNVRKIQCFWRHRRNQDKPPTLTKFCESMRWFTFYLCIFCYGIR
CERS5_D13     81  SGPYQAQPNAILKVFISITKYPDKKRLEGLSKQLDWNVRKIQCFWRHRRNQDKPPTLTKFCESMRWFTFYLCIFCYGIR
CERS5_D18     81  SGPYQAQPNILEKVFITITKYPDKKRLEGLSKQLDWNVRKIQCFWRHRRNQDKPPTLTKFCESMRWFTFYLCIFCYGLR
      . : * * * * * * * * * * * * * * * * * * * * * * * * * * * * * * * * * * * * * * * * *
      . : * * * * * * * * * * * * * * * * * * * * * * * * * * * * * * * * * * * * * * * * *

CERS2_WT      153 VIVDKPWFYDMKKVWEGYPIQSTIPSYQWYYMIELSFYWSLLFSIASDVKRRDFKEQIIHHVATIILISFSWFANYIRAG
CERS2_D5      153 VIVDKPWFYDMKKVWEGYPIQSTIPSYQWYYMIELSFYWSLLFSIASDVKRRDFKEQIIHHVATIILISFSWFANYIRAG
CERS2_D10     153 VIVDKPWFYDMKKVWEGYPIQSTIPSYQWYYMIELSFYWSLLFSIASDVKRRDFKEQIIHHVATIILISFSWFANYIRVG
CERS2_D13     153 VIVDKPWFYDMKKVWEGYPIQSTIPSYQWYYMIELAFYWSLLFSIASDVKRRDFKEQIIHHVATIILISFSWFANYIRVG
CERS2_D18     153 VIVDKPWFYDMKKVWEGYPIQSTIPSYQWYYMIELAFYWSLLFSIASDVKRRDFKEQIIHHVATIILISFSWFANYIRIG
CERS5_WT      161 FLWSSPWFWDIRQCWHNYFPQPLSSGLYHYIIMELAFYWSLMFSQFTDIKRRDFLIMFVHHLVITIGLISFSYINNMRVVG
CERS5_D5      161 FLWSSPWFWDIRQCWHNYFPQPLSSGLYWYYIMELAFYWSLMFSQFTDIKRRDFLIMFVHHLVITIGLISFSYINNMRVVG
CERS5_D13     161 FLWSSPWFWDIRQCWHNYFPQPLSSGLYWYYIMELAFYWSLMFSQFTDIKRRDFLIMFVHHLVITIGLISFSYINNMRVVG
CERS5_D18     161 FLWISPPWFWDIRQCWHNYFPQPLSSGLYWYYIIMELAFYWSLMFSQFTDIKRRDFLIMFVHHLVITIGLISFSYINNMRVVG
      . : * * * * * * * * * * * * * * * * * * * * * * * * * * * * * * * * * * * * * * * * *
      . : * * * * * * * * * * * * * * * * * * * * * * * * * * * * * * * * * * * * * * * * *

CERS2_WT      233 TLIMALHDSSDYLLLES AKMFNYAGWKNTCNNIFIVFAIVFIITRLVILPFWILHCTLVYPLELYPAFFGYFFNSMMGVL
CERS2_D5      233 TLIMALHDSSDYLLLES AKMFNYAGWKNTCNNIFIVFAIVFIITRLVILPFWILYCTLVYPLELYPAFFGYFFNSMMGVL
CERS2_D10     233 TLIMALHDSSDYLLLES AKMFNYAGWKNTCNNIFIVFAIVFIITRLVILPFWILYCTLVYPLELYPAFFGYFFNSMMGLL
CERS2_D13     233 TLIMALHDSSDYLLLES AKMFNYAGWKNTCNNIFIVFAIVFIITRLVILPFWILYCTLVYPLELYPAFFGYFFNMMGLL
CERS2_D18     233 TLIMALHDADYLLLES AKMFNYAGWKNTCNNIFIVFAIVFIITRLVILPFWILYCTLVYPLELYPAFFGYFFNLMGLL
CERS5_WT      241 TLIMCLHDVSDFLLEAAKLANYAKYQRLCDFLVIFSAVFMVTRLG IYPFWILNTTLFESWEIIGPYASWWLLNGLLLLLL
CERS5_D5      241 TLIMCLHDVSDFLLEAAKLANYAKYQRLCDFLVIFSAVFMVTRLG IYPFWILNTTLFESWEIIGPYASWWLLNGLLLLLL
CERS5_D13     241 TLIMCLHDVSDFLLEAAKLANYAKYQRLCDFLVIFSAVFMVTRLG IYPFWILNTTLFESWEIIGPYASWWLLNGLLLLLL
CERS5_D18     241 TLVMLLDVSDFLLEAAKLANYAKYQRLCDFLVIFSAVFMVTRLG IYPFWILNTTLFESWEIIGPYASWWLLNGLLLLLL
      * * * * * * * * * * * * * * * * * * * * * * * * * * * * * * * * * * * * * * * * *
      * * * * * * * * * * * * * * * * * * * * * * * * * * * * * * * * * * * * * * * * *

CERS2_WT      313 QLLHIFWAYLILRMAHK-FITGKLVEDERSDREETESSEGEAAAGGAKSRPLANGHPILN----NNHRKND
CERS2_D5      313 QLLHIFWAYLILRMAHK-FITGKLVEDERSDREETESSEGEAAAGGAKSRPLANGHPILN----NNHRKND
CERS2_D10     313 QLLHIFWAFILIRMAHK-FITGKLVEDERSDREETESSEGEAAAGGAKSRPLANGHPILN----NNHRKND
CERS2_D13     313 QLLHIFWAFILIRMAHK-FITGKLVEDERSDREETESSEGEAAAGGAKSRPLANGHPILN----NNHRKND
CERS2_D18     313 QLLHIFWAFILIRMAHK-FITGKLVEDERSDREETESSEGEAAAGGAKSRPLANGHPILN----NNHRKND
CERS5_WT      321 QLLHVIWSYLIARIALKALIRGKVS KDRSDVESSEEDVTCTKSPCDS-SSSNGANRVNGHMGGSYWAE
CERS5_D5      321 QLLHIIWSYLIARIALKALIRGKVS KDRSDVESSEEDVTCTKSPCDS-SSSNGANRVNGHMGGSYWAE
CERS5_D13     321 QLLHIFWAFILIRIALKALIRGKVS KDRSDVESSEEDVTCTKSPCDS-SSSNGANRVNGHMGGSYWAE
CERS5_D18     321 QLLHIFWAFILIRIALKALIRGKVS KDRSDVESSEEDVTCTKSPCDS-SSSNGANRVNGHMGGSYWAE
      * * * * * * * * * * * * * * * * * * * * * * * * * * * * * * * * * * * * * * * * *
      * * * * * * * * * * * * * * * * * * * * * * * * * * * * * * * * * * * * * * * * *

```

**Supplementary Fig 2. Sequence alignment of WT and mPROSS designs.** Amino acid multiple sequence alignment of mPROSS designed variants of CerS2 and CerS5 together with that of WT controls (CLUSTALW multiple alignments). The consensus line below the aligned sequences indicates positions of conserved amino acid where the asterisks (\*) indicate identical residues, colons (:), and periods (.) indicate similar residues, with colons indicating higher similarity than periods. Mutations introduced by mPROSS are highlighted in yellow. Altogether 18 designs were obtained by mPROSS for each CerS, of which 4 were generated, expressed and tested for activity for CerS2 and 3 for CerS5.

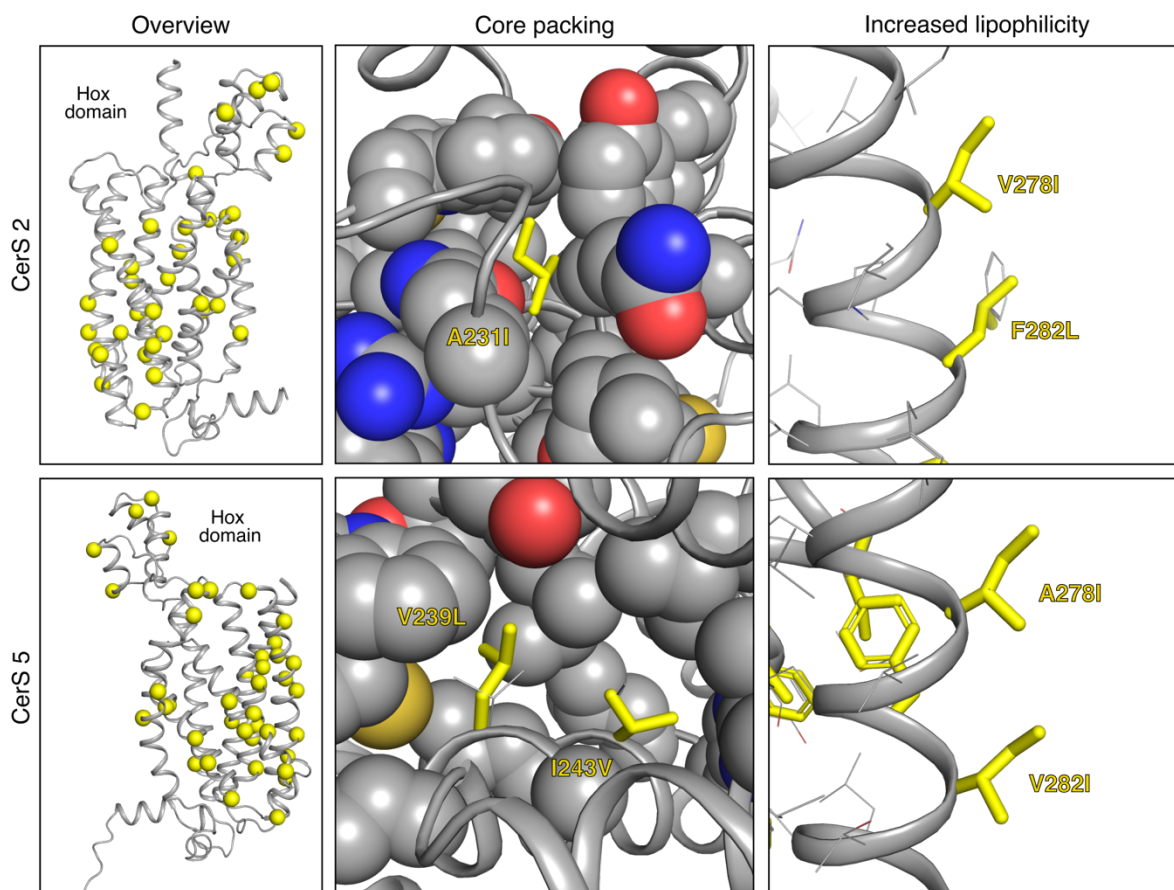

**Supplementary Fig 3. CerS stabilization by mPROSS.** Yellow spheres denote mutated positions. 37 and 41 substitutions were introduced in d18 of CerS2 and CerS5, respectively. Some mutations improve interhelical core packing and remove cavities (center panels). Many mutations increase lipophilicity (*right-hand* panels). Mutations are shown in yellow, wild type residues in grey.

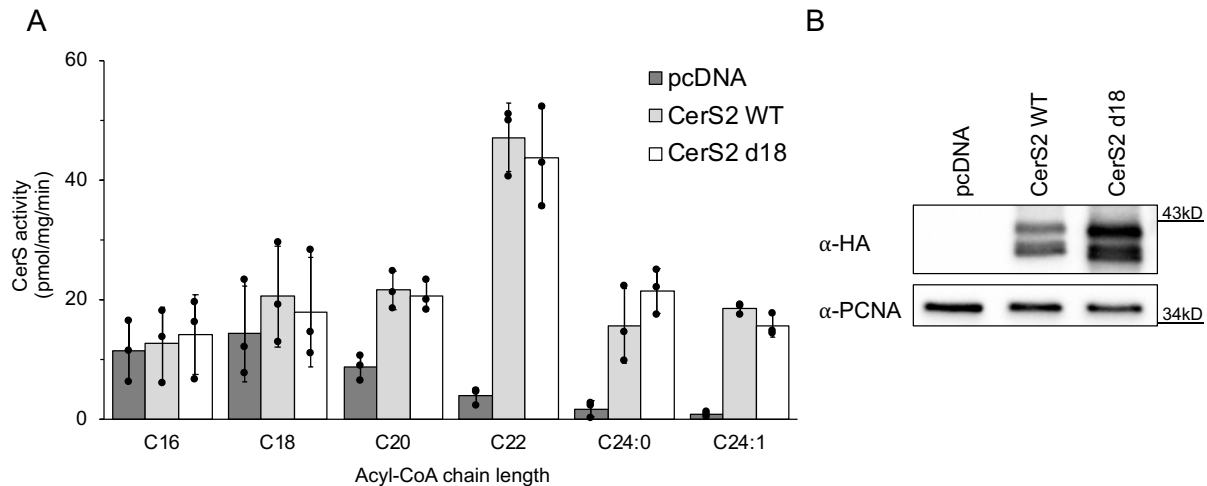

**Supplementary Fig. 4. Acyl-CoA specificity of CerS2 d18 is similar to the WT. (A)**

Homogenates (40  $\mu$ g of protein) from HEK<sup>CerS2<sup>-/-</sup></sup> cells overexpressing an empty vector, WT or d18 CerS2, were assayed using the indicated acyl-CoA for 25 minutes. Results are means  $\pm$  S.D., n = 3. (B) CerS2 expression ascertained by Western blotting using an anti-HA antibody. An anti-PCNA antibody was used as loading control. Molecular weight markers are indicated. Results are of a single experiment, repeated three times with similar results. Source data are provided as a Source Data file.



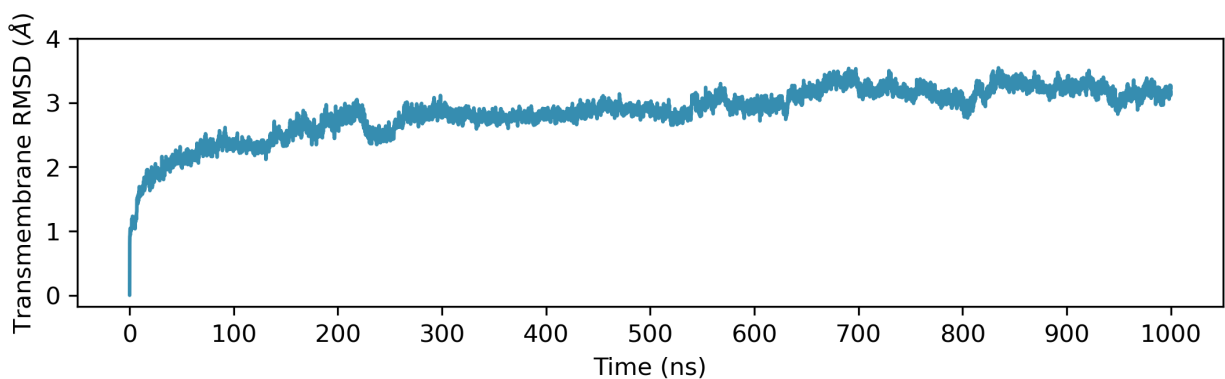

**Supplementary Fig. 5.** RMSD (Å) of the CerS2 TMD during production-stage MD simulations. RMSD was calculated with translation and rotation to compare the protein structure at each frame with the reference protein structure at the beginning of simulation. Source data are provided as a Source Data file.

### Supplementary References

1. Andreyev, A. Y. *et al.* Subcellular organelle lipidomics in TLR-4-activated macrophages. *J Lipid Res* 51, 2785–97 (2010).
2. Bollen, I. C. & Higgins, J. A. Phospholipid asymmetry in rough- and smooth-endoplasmic-reticulum membranes of untreated and phenobarbital-treated rat liver. *Biochem J* 189, 475–480 (1980).
